# Supplementary material
Source: PubMed Central journal article supplement (PMC1794294)

**a****Maximal tetanic tension****(mN)**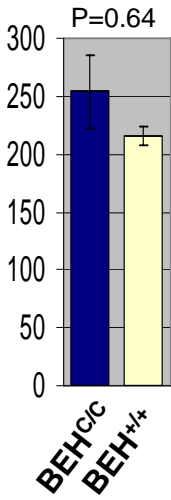**b****Specific tetanic tension****(N/g)**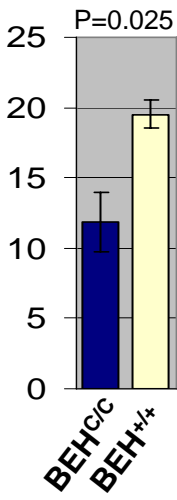

Supplement: pnas_0604893104_1.pdf [file pnas_0604893104_1.pdf]

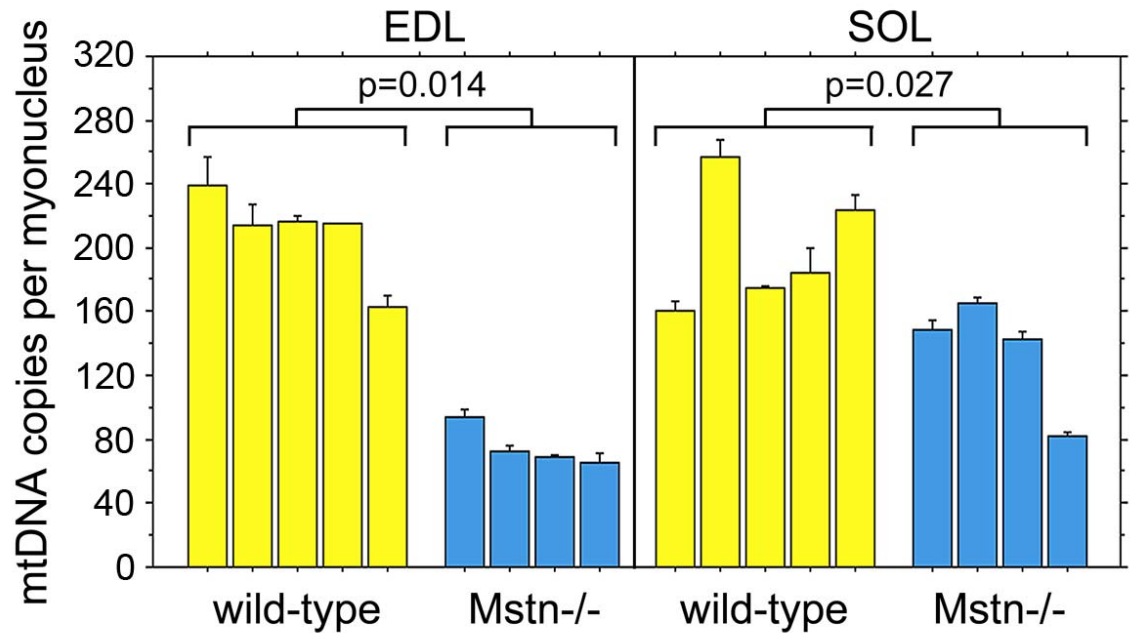

Supplement: pnas_0604893104_2.pdf [file pnas_0604893104_2.pdf]

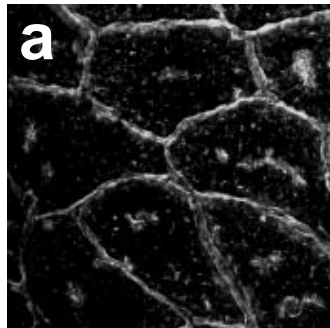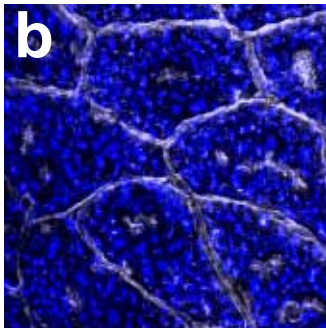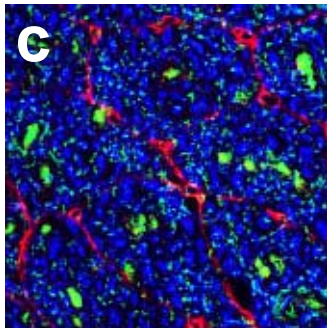

**d**

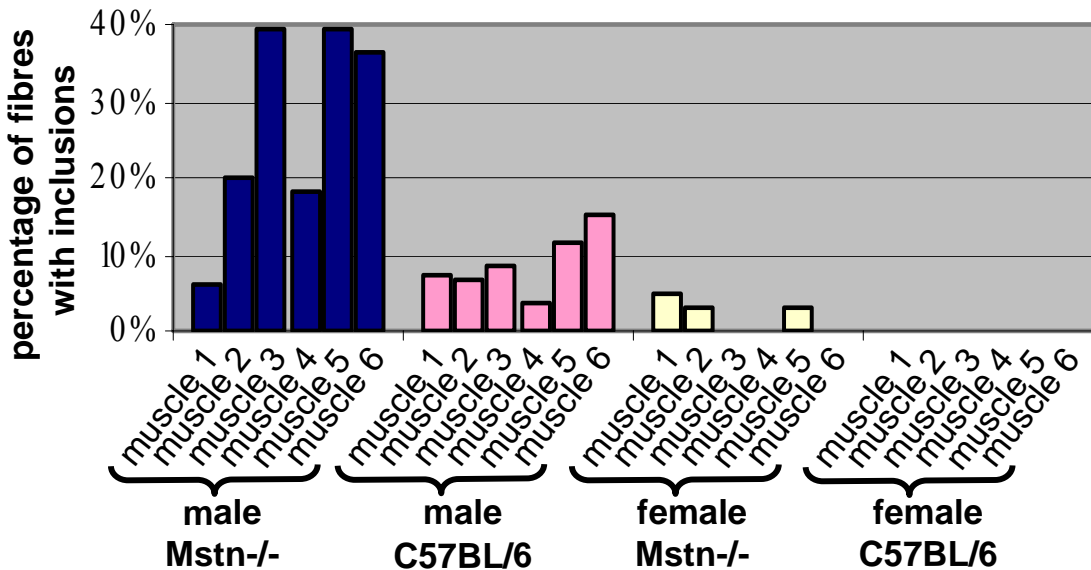

Supplement: pnas_0604893104_3.pdf [file pnas_0604893104_3.pdf]
